# Supplementary material for: Non-Transgenic CRISPR-Mediated Knockout of Entire Ergot Alkaloid Gene Clusters in Slow-Growing Asexual Polyploid Fungi
Source: MDPI journal article supplement (doi:10.3390/toxins13020153), 2021-02-16
Supplement: s1 [file s1]

# Supplementary Materials: Non-Transgenic CRISPR-Mediated Knockout of Entire Ergot Alkaloid Gene Clusters in Slow-Growing Asexual Polyploid Fungi

Simona Florea, Jolanta Jaromczyk and Christopher L. Schardl

**Table S1.** Genome assembly statistics for wild-type *Epichloë* species.

| Metric                                | <i>Epichloë coenophiala</i> e19 | <i>Epichloë hybrida</i> Lp1 |
|---------------------------------------|---------------------------------|-----------------------------|
| Genome assembly size (bp)             | 104,225,103                     | 79,884,907                  |
| Scaffolds (no.)                       | 216                             | 158                         |
| Max. scaffold size (bp)               | 12,291,650                      | 8,313,425                   |
| Min. scaffold size (bp)               | 1915                            | 9259                        |
| N50 (bp)                              | 1,403,312                       | 2,103,505                   |
| L50 (no. of scaffolds)                | 18                              | 10                          |
| N75 (bp)                              | 684,515                         | 887,067                     |
| L75 (no. of scaffolds)                | 45                              | 27                          |
| Illumina reads (no.)                  | 16,788,872                      | 71,267,884                  |
| Illumina base calls (no.)             | 4,448,992,415                   | 9,127,788,485               |
| Ave. Illumina read length             | 265                             | 128                         |
| Illumina coverage (fold)              | 43                              | 114                         |
| Pyrosequencing reads (no.)            | 5,776,008                       | 1,124,539                   |
| Pyrosequencing base calls (no.)       | 2,161,940,715                   | 1,076,298,682               |
| Ave. pyrosequencing read length       | 374                             | 957                         |
| Pyrosequencing coverage (fold)        | 21                              | 13                          |
| Nanopore reads (no.)                  | 361,005                         | 878,554                     |
| Nanopore base calls (no.)             | 2,111,083,110                   | 2,779,076,273               |
| Ave. nanopore read length             | 5848                            | 3163                        |
| Nanopore coverage (fold) <sup>1</sup> | 20                              | 35                          |
| Total fold coverage                   | 84                              | 128                         |

<sup>1</sup> Only the largest nanopore reads totaling 25-fold coverage were used in the assembly.

Table S2. Genome assembly statistics for CRISPR/Cas9-mediated mutants.

| Mutant | Genome Assembly Size (bp) | Scaffolds (no.) | Max. Scaffold Length (bp) | N50 (bp) | Reads (no.) | Base Calls (no.) | Coverage (fold) |
|--------|---------------------------|-----------------|---------------------------|----------|-------------|------------------|-----------------|
| e7799  | 90,327,603                | 29,499          | 103,486                   | 5611     | 36,650,711  | 9,411,821,892    | 104             |
| e7800  | 85,819,038                | 30,898          | 89,851                    | 4904     | 30,654,940  | 7,896,903,623    | 92              |
| e7801  | 86,426,610                | 6978            | 203,325                   | 26,484   | 40,964,917  | 10,469,527,658   | 121             |
| e7802  | 88,355,357                | 31,299          | 117,788                   | 5000     | 29,022,201  | 7,397,281,238    | 84              |
| e7804  | 86,152,688                | 31,471          | 83,061                    | 4802     | 34,372,962  | 8,842,724,973    | 103             |
| e7805  | 89,955,890                | 29,760          | 99,576                    | 5454     | 36,448,796  | 9,381,695,565    | 104             |
| e7806  | 71,447,975                | 15,937          | 97,404                    | 10,468   | 34,419,574  | 8,841,841,659    | 124             |

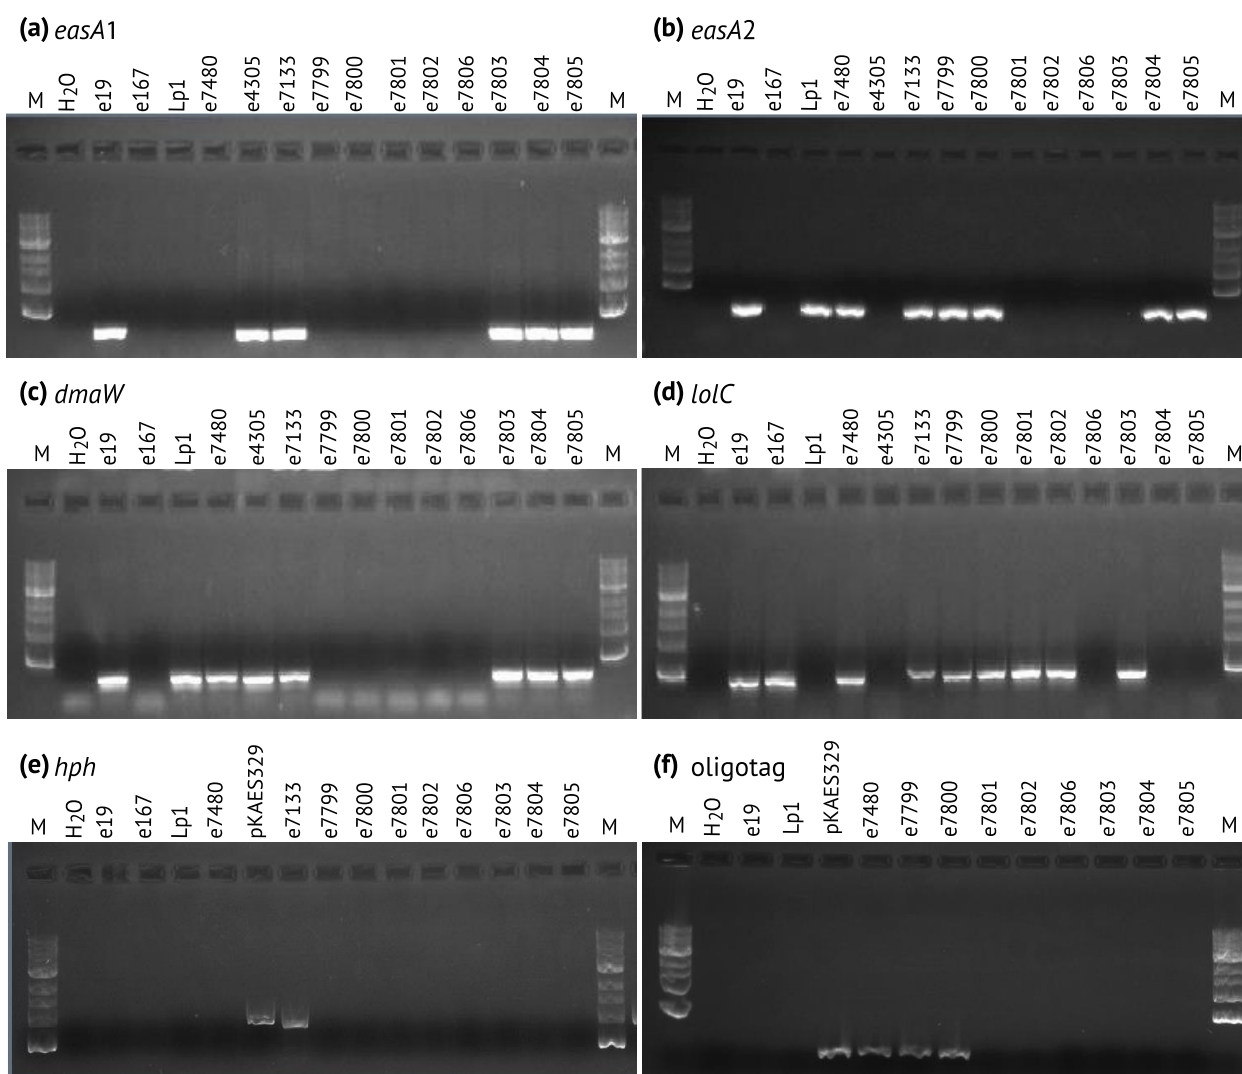

**Figure S1.** PCR tests of putative CRISPR/Cas9-mediated deletion mutants. (a) PCR tests with primers specific for *easA1* from the ergot alkaloid gene cluster *EAS1*. (b) PCR tests with primers specific for *easA2* from *EAS2*. (c) PCR tests for *dmaW* genes. (d) PCR tests for the *lolC* gene from the loline alkaloid (*LOL*) gene cluster. (e) PCR tests for the *hph* gene present on the selectable plasmids pKAES328 and pKAES329. (f) PCR tests for the oligotag present on the plasmids. Controls are: H<sub>2</sub>O = no template PCR control; WT = *Epichloë coenophiala* e19, harboring *EAS1*, *EAS2* and *LOL* gene clusters; e167 = wild-type *Epichloë uncinata*, which lacks all *EAS* genes but harbors two *LOL* gene clusters; Lp1 = *Epichloë hybrida* Lp1, which has an *EAS2* orthologue but no *EAS1* or *LOL* cluster; e4305 = WT *Epichloë* sp. FaTG-4 which has an *EAS1* orthologue but no *EAS2* or *LOL* cluster; e7133 = a derivative of e19 that possesses *dmaW1* but has an *hph* cassette in place of a partial deletion in *dmaW2*; e7480 = an *EAS1*-knockoff mutant of e19. Screened isolates (Table 3) are: putative  $\Delta dmaW2$  mutants of e7480 designated e7799 and e7800; putative  $\Delta EAS1 \Delta EAS2$  mutants of e19 designated e7801 and e7802; a putative  $\Delta EAS2$  mutant

---

of *E. hybrida* Lp1 designated e7806; a putative  $\Delta EAS2$  mutant of e19 designated e7803; and putative  $\Delta lolC$  mutants of e19 designated e7804 and e7805.
